# Supplementary material for: Molecular Design and In-Silico Analysis of Trisubstituted Benzimidazole Derivatives as Ftsz Inhibitor
Source: Hindawi journal article supplement (doi:10.1155/2023/9307613), 2023-03-01
Supplement: f1 [file 9307613.f1.docx]

**Molecular design and in-silico analysis of trisubstituted benzimidazole derivatives as Ftsz inhibitor**

Shankar Thapa1*, Shachindra L. Nargund1, Mahalakshmi Suresha Biradar1

1Department of Pharmaceutical Chemistry, Nargund College of Pharmacy, Bengaluru-560085, India

**Table S1**: Aldehyde and amine substituted benzimidazole ligands

| Code | Structure | IUPAC Name |
| --- | --- | --- |
| A1 |  | 5-[4-(1H-imidazol-1-yl) phenoxy]-1H-1,3-benzodiazol-2-amine |
| A2 |  | 5-[4-(1H-imidazol-1-yl) phenoxy]-1H-1,3-benzodiazol-2-amine |
| A3 |  | 2-[(1E) -({5-[4-(1H-imidazol-1-yl) phenoxy]-1H-1,3-benzodiazol-2-yl} imino) methyl] phenol |
| A4 |  | 4-({6-fluoro-5-[4-(1H-imidazol-1-yl) phenoxy]-1H-1,3-benzodiazol-2-yl} amino) benzaldehyde |
| A5 |  | 4-[(1E) -({6-fluoro-5-[4-(1H-imidazol-1-yl) phenoxy]-1H-1,3-benzodiazol-2-yl} imino) methyl] phenol |
| A6 |  | (1E)-N-{6-fluoro-5-[4-(1H-imidazol-1-yl) phenoxy]-1H-1,3-benzodiazol-2-yl}-1-(2-nitrophenyl) methanimine |
| A7 |  | 2-[(1E) -({6-fluoro-5-[4-(1H-imidazol-1-yl) phenoxy]-1H-1,3-benzodiazol-2-yl} imino) methyl]-5-methoxyphenol |
| A8 |  | (1E)-N-{6-fluoro-5-[4-(1H-imidazol-1-yl) phenoxy]-1H-1,3-benzodiazol-2-yl}-1-(4-methoxyphenyl) methanimine |
| A9 |  | N1-{6-fluoro-5-[4-(1H-imidazol-1-yl) phenoxy]-1H-1,3-benzodiazol-2-yl} benzene-1,2-diamine |
| A10 |  | N1-{6-fluoro-5-[4-(1H-imidazol-1-yl) phenoxy]-1H-1,3-benzodiazol-2-yl} benzene-1,3-diamine |
| A11 |  | N1-{6-fluoro-5-[4-(1H-imidazol-1-yl) phenoxy]-1H-1,3-benzodiazol-2-yl} benzene-1,4-diamine |
| A12 |  | 2-chloro-N1-{6-fluoro-5-[4-(1H-imidazol-1-yl) phenoxy]-1H-1,3-benzodiazol-2-yl} benzene-1,4-diamine |
| A13 |  | 4-chloro-N1-{6-fluoro-5-[4-(1H-imidazol-1-yl) phenoxy]-1H-1,3-benzodiazol-2-yl} benzene-1,3-diamine |
| A14 |  | 3-fluoro-N1-{6-fluoro-5-[4-(1H-imidazol-1-yl) phenoxy]-1H-1,3-benzodiazol-2-yl} benzene-1,2-diamine |
| A15 |  | 2,3,5,6-tetrafluoro-N1-{6-fluoro-5-[4-(1H-imidazol-1-yl) phenoxy]-1H-1,3-benzodiazol-2-yl} benzene-1,4-diamine |
| A16 |  | N1-{6-fluoro-5-[4-(1H-imidazol-1-yl) phenoxy]-1H-1,3-benzodiazol-2-yl}-3-nitrobenzene-1,4-diamine |
| A17 |  | 3-bromo-N1-{6-fluoro-5-[4-(1H-imidazol-1-yl) phenoxy]-1H-1,3-benzodiazol-2-yl}-5-nitrobenzene-1,2-diamine |
| A18 |  | N1-{6-fluoro-5-[4-(1H-imidazol-1-yl) phenoxy]-1H-1,3-benzodiazol-2-yl}-5-methylbenzene-1,2-diamine |
| A19 |  | N1-{6-fluoro-5-[4-(1H-imidazol-1-yl) phenoxy]-1H-1,3-benzodiazol-2-yl}-2-methylbenzene-1,4-diamine |
| A20 |  | N1-{6-fluoro-5-[4-(1H-imidazol-1-yl) phenoxy]-1H-1,3-benzodiazol-2-yl}-3-methylbenzene-1,4-diamine |

**Table S2:** Physiochemical properties of Ftsz protein

| Physiochemical properties | Ftsz (PDB ID:1R7Q) |
| --- | --- |
| Molecular Weight | 38755.89 |
| Molecular Formula | C1678H2744N476O547S13 |
| Total no. of atoms | 5458 |
| Total no. of amino acid | 379 |
| Theoretical PI | 4.55 |
| Aliphatic index | 97.57 |
| Instability index | 29.27 |
| GRAVY | 0.119 |
| +R (Arg + Lys) | 31 |
| -R (Asp + Glu) | 52 |
| Ext. coefficient /Abs 0.1% (=1 g/l) | 0.038 |


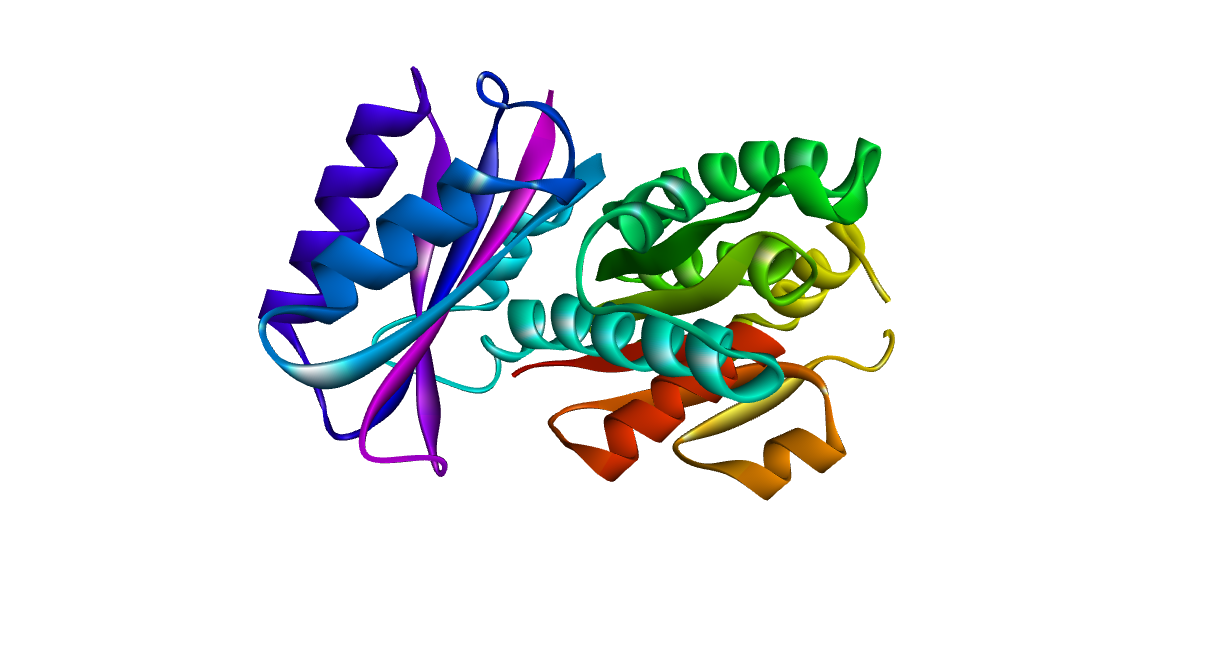


**Figure S1**: 3D structure of FtsZ protein (PDB ID:1RQ7)


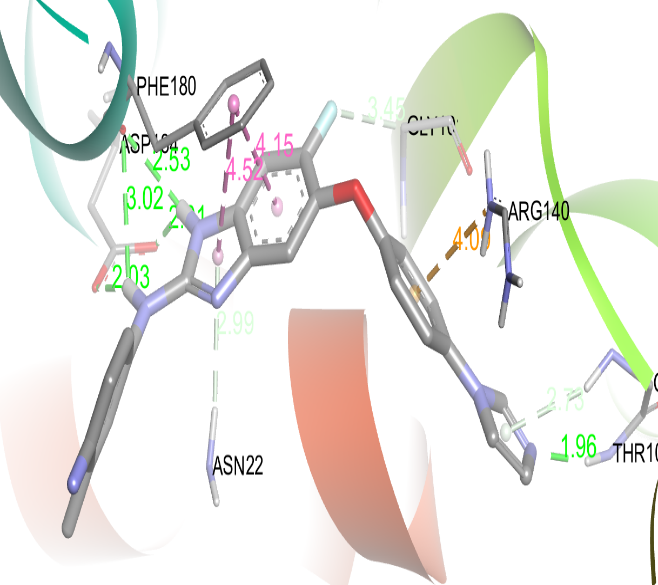

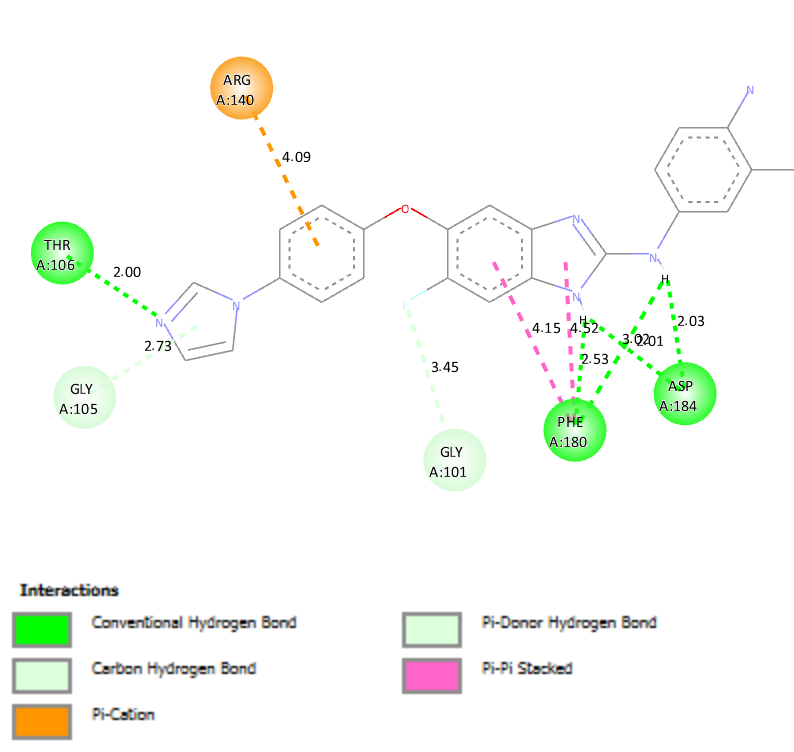


**Figure S2:** 3D and 2D interaction of A20 with FtsZ protein


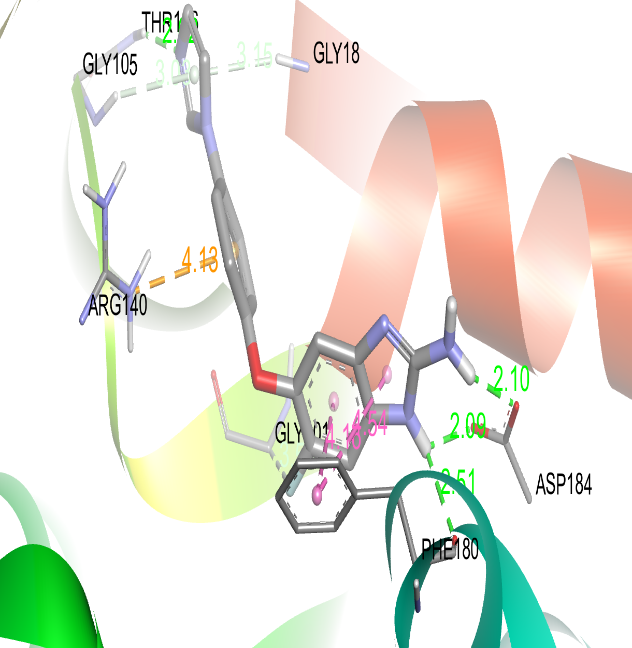

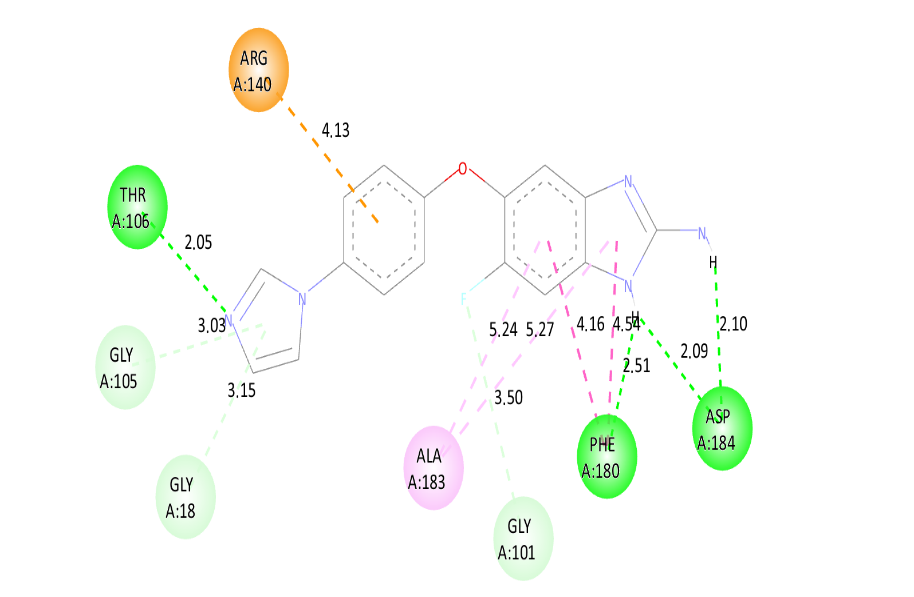


**Figure S3**: 3D and 2D interaction of A1 with FtsZ protein
